# Supplementary material
Source: MDPI journal article supplement (https://www.mdpi.com/2311-7524/10/1/71)
Supplement: s1 [file s1]

**Table S1.** Chemical names of materials used to prepare nutrient solutions.

| Chemical name                                                       | Nutrient solution formulations (mg/L) |                        |                               |             |
|---------------------------------------------------------------------|---------------------------------------|------------------------|-------------------------------|-------------|
|                                                                     | Enshi [35]                            | Hogland and Arnon [36] | Resh Tropical Dry Summer [37] | Cooper [38] |
| Ca(NO <sub>3</sub> ) <sub>2</sub>                                   | 475.0                                 | 656.0                  | 1,475.94                      | 100.3       |
| Fe-EDTA                                                             | 23.6                                  | 2.2                    | 23.6                          | 79.0        |
| KNO <sub>3</sub>                                                    | 405.0                                 | 606.0                  | 230.53                        | 583.0       |
| KH <sub>2</sub> PO <sub>4</sub>                                     | -                                     | -                      | 10.89                         | 263.0       |
| NH <sub>4</sub> H <sub>2</sub> PO <sub>4</sub>                      | 77.5                                  | 345.0                  | 188.65                        | -           |
| MgSO <sub>4</sub> ·4H <sub>2</sub> O                                | 250.0                                 | 490.0                  | 369.72                        | 513.0       |
| MnSO <sub>4</sub> ·4H <sub>2</sub> O                                | 1.538                                 | -                      | 1.54                          | 6.1         |
| ZnSO <sub>4</sub> ·7H <sub>2</sub> O                                | 0.22                                  | 0.22                   | 0.22                          | 4.4         |
| CuSO <sub>4</sub> ·5H <sub>2</sub> O                                | 0.08                                  | 0.08                   | 0.08                          | 3.9         |
| MnCl <sub>2</sub> ·4H <sub>2</sub> O                                | -                                     | 1.81                   | -                             | -           |
| H <sub>2</sub> MoO <sub>4</sub> ·2H <sub>2</sub> O                  | -                                     | 0.09                   | -                             | -           |
| (NH <sub>4</sub> ) <sub>2</sub> MoO <sub>7</sub> ·4H <sub>2</sub> O | -                                     | -                      | 0.017                         | 3.7         |
| H <sub>3</sub> BO <sub>3</sub>                                      | 2.86                                  | 2.86                   | 2.86                          | 1.7         |
| Na <sub>2</sub> SO <sub>4</sub>                                     | -                                     | -                      | 162.65                        | -           |
| K <sub>2</sub> SO <sub>4</sub>                                      | -                                     | -                      | 241.36                        | -           |
| EC (mS/cm)                                                          | 1.2-1.5                               | 2.5-2.8                | 2.0-2.5                       | 2.5-2.8     |

**Table S2.** Combinations of light emitting diodes and photosynthetic photon flux densities (PPFD).

| Total PPFD (μmol/m <sup>2</sup> /s) | Blue<br>(445 nm) | Red<br>(638 nm) | Red<br>(665 nm) | Far-red<br>(735 nm) |
|-------------------------------------|------------------|-----------------|-----------------|---------------------|
| 330                                 | 25               | 136             | 166             | 3                   |
| 220                                 | 17               | 90              | 11              | 2                   |
| 110                                 | 9                | 45              | 55              | 1                   |

**Note:** Based on Tamulaitis et al. (2005) and Samuoliene et al. (2013).

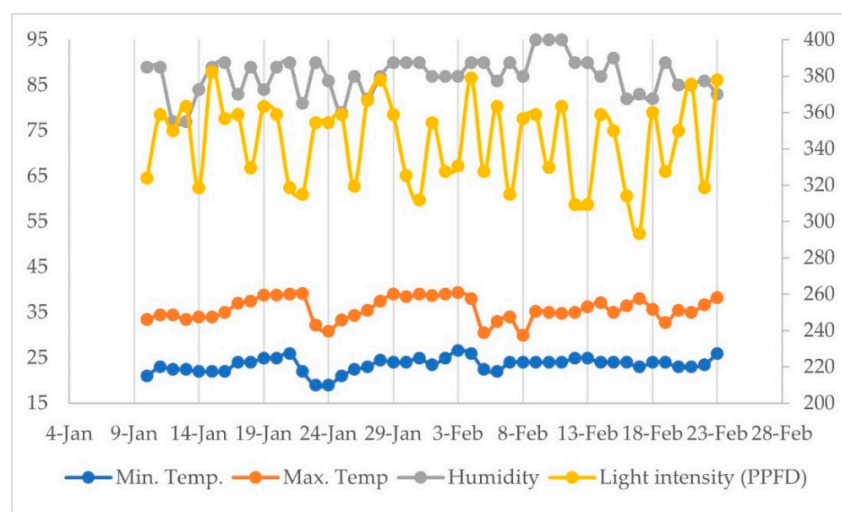**Figure S1.** Ambient temperature, humidity, and light intensity of the greenhouse during the cultivation period.
